# Supplementary material for: Vitamin D Supplementation during Intensive Care Unit Stay Is Associated with Improved Outcomes in Critically Ill Patients with Sepsis: A Cohort Study
Source: MDPI journal article supplement (doi:10.3390/nu15132924), 2023-06-28
Supplement: s1 [file s1]

# Vitamin D Supplementation during Intensive Care Unit Stay Is Associated with Improved Outcomes in Critically Ill Patients with Sepsis: A Cohort Study

## Supplemental Materials

**Table S1** ORs and HRs of each factor in adjusted model 3

| <b>Adjusted factors</b>   | <b>ORs for in-hospital mortality</b> | <b>HRs for 28-day mortality</b> | <b>HRs for 90-day mortality</b> |
|---------------------------|--------------------------------------|---------------------------------|---------------------------------|
| Age (years)               | 1.02(1.01-1.02)                      | 1.02(1.01-1.02)                 | 1.01(1.01-1.02)                 |
| Male (n (%))              | \                                    | \                               | \                               |
| Weight (Kg)               | \                                    | 0.996(0.993-0.999)              | \                               |
| RR (/min)                 | 1.05(1.03-1.07)                      | 1.05(1.04-1.07)                 | 1.05(1.03-1.06)                 |
| SBP (mmHg)                | 0.99(0.986-0.994)                    | 0.991(0.987-0.994)              | 0.991(0.988-0.994)              |
| Temperature (°C)          | 0.61(0.53-0.70)                      | 0.69(0.62-0.76)                 | 0.68(0.62-0.74)                 |
| MI (n (%))                | \                                    | \                               | \                               |
| CHF (n (%))               | 0.65(0.51-0.81)                      | 0.75(0.63-0.89)                 | 0.73(0.62-0.97)                 |
| CKD (n (%))               | \                                    | \                               | \                               |
| AKI (n (%))               | \                                    | \                               | \                               |
| Diabetes (n (%))          | \                                    | \                               | \                               |
| Osteoporosis (n (%))      | \                                    | \                               | \                               |
| Septic shock (n (%))      | 1.62(1.35-1.94)                      | 1.54(1.33-1.78)                 | 1.50(1.31-1.72)                 |
| Cerebral diseases (n (%)) | \                                    | \                               | \                               |
| RBC (m/uL)                | 0.72(0.63-0.82)                      | \                               | 0.86(0.78-0.95)                 |
| WBC (K/uL)                | 1.04(1.03-1.05)                      | 1.01(1.01-1.02)                 | 1.01(1.01-1.02)                 |
| Platelet (K/uL)           | 0.999(0.998-0.999)                   | 0.999(0.988-0.994)              | 0.999(0.998-0.999)              |
| Hemoglobin (g/dL)         | \                                    | \                               | \                               |
| Potassium (mmol/L)        | 1.36(1.20-1.55)                      | 1.35(1.23-1.47)                 | 1.32(1.21-1.44)                 |
| Chloride (mmol/L)         | \                                    | \                               | \                               |
| Creatinine(mg/dL)         | 1.16(1.09-1.23)                      | 1.14(1.10-1.18)                 | 1.11(1.08-1.15)                 |
| Glucose (mmol/L)          | 1.004(1.002-1.005)                   | 1.002(1.001-1.003)              | 1.002(1.001-1.003)              |
| Lactate (mg/dL)           | 1.29(1.23-1.35)                      | 1.19(1.17-1.22)                 | 1.19(1.17-1.21)                 |
| Vasopressin (n (%))       | \                                    | \                               | \                               |
| Antibiotic (n (%))        | \                                    | \                               | \                               |
| MV (n (%))                | 2.41(1.80-3.24)                      | 2.09(1.63-2.69)                 | 1.91(1.52-2.39)                 |

RR, respiratory rate; SBP, systolic blood pressure; MI, myocardial infarction; CHF, chronic heart failure; CKD, chronic kidney disease; AKI, acute kidney injury; RBC, red blood cell; WBC, white blood cell; MV, mechanical ventilation.

**Table S2** Association between Vitamin D supplementation and clinical outcomes using multivariate regression analysis after adjusting for doses of Vitamin D

| Vitamin D<br>Supplementation | Number<br>of patients | ORs for<br>in-hospital mortality | HRs for 28-day<br>mortality | HRs for 90-day<br>mortality |
|------------------------------|-----------------------|----------------------------------|-----------------------------|-----------------------------|
| No                           | 3224                  | Ref                              | Ref                         | Ref                         |
| Yes                          | 315                   | 0.69(0.52-0.91)                  | 0.66(0.50-0.89)             | 0.75(0.57-0.99)             |

*Ref, reference group.*

**Table S3** The baseline information and outcome of young patients with sepsis (age < 60 years)

|                           | Before PSM            |                    |         | After PSM             |                    |         |
|---------------------------|-----------------------|--------------------|---------|-----------------------|--------------------|---------|
|                           | Non-VD                | VD-supplementation | p-value | Non-VD                | VD-supplementation | p-value |
|                           | supplementation group | group              |         | supplementation group | group              |         |
|                           | (n= 3224)             | (n= 315)           |         | (n= 70)               | (n= 70)            |         |
| Demographic data          |                       |                    |         |                       |                    |         |
| Age (years )              | 51(42-56)             | 52(44-56)          | 0.22    | 52(43-56)             | 52(43-56)          | 0.78    |
| Male (n (%))              | 457(43.9)             | 35(46.1)           | 0.40    | 24(34.3)              | 31(44.3)           | 0.15    |
| Weight (Kg)               | 80(68-100)            | 84(68-107)         | 0.58    | 88(69-102)            | 84(69-107)         | 0.51    |
| Vital signs               |                       |                    |         |                       |                    |         |
| RR (/min)                 | 22(18-25)             | 21(17.1-25)        | 0.37    | 21(18-25)             | 21(17-25)          | 0.73    |
| SBP (mmHg)                | 109(96-126)           | 108(95-123)        | 0.56    | 117(99-127)           | 108(93-124)        | 0.27    |
| DBP (mmHg)                | 61(52-70)             | 62(52-76)          | 0.46    | 63(52-75)             | 64(52-76)          | 0.67    |
| Temperature (°C)          | 37.1(36.7-37.6)       | 37.0(36.7-37.6)    | 0.83    | 37.1(36.8-37.7)       | 37.1(36.7-37.6)    | 0.54    |
| Comorbidities             |                       |                    |         |                       |                    |         |
| MI (n (%))                | 54(5.2)               | 1(1.3)             | 0.10    | 3(4.3)                | 1(1.4)             | 0.31    |
| AF (n (%))                | 44(4.2)               | 7(9.2)             | 0.052   | 11(15.7)              | 6(8.6)             | 0.15    |
| CHF (n (%))               | 82(7.9)               | 10(13.2)           | 0.09    | 13(18.6)              | 10(14.3)           | 0.32    |
| CKD (n (%))               | 136(13.1)             | 16(21.1)           | 0.04    | 10(14.3)              | 15(21.4)           | 0.19    |
| AKI (n (%))               | 581(55.8)             | 42(55.3)           | 0.51    | 36(51.4)              | 37(52.9)           | 0.50    |
| Diabetes (n (%))          | 274(26.3)             | 26(34.2)           | 0.09    | 19(27.1)              | 24(34.3)           | 0.23    |
| Osteoporosis (n (%))      | 21(2.0)               | 12(15.8)           | <0.001  | 13(18.6)              | 10(14.3)           | 0.32    |
| Cerebral diseases (n (%)) | 113(10.8)             | 6(7.9)             | 0.28    | 5(7.1)                | 6(8.6)             | 0.50    |
| Clinical indices          |                       |                    |         |                       |                    |         |
| RBC (m/uL)                | 3.3(2.8-3.8)          | 3.2(2.8-3.9)       | 0.72    | 3.4(2.8-3.9)          | 3.2(2.8-4.0)       | 0.81    |
| WBC (K/uL)                | 10.2(6.6-15.3)        | 8.0(5.9-14.0)      | 0.18    | 10.1(5.8-15.2)        | 8.0(5.8-15.3)      | 0.80    |
| Platelet (K/uL)           | 178(112-272)          | 177(112-285)       | 0.78    | 178(121-253)          | 177(113-276)       | >0.90   |
| Hemoglobin                | 9.8(8.5-11.3)         | 10.0(8.4-11.7)     | 0.83    | 9.5(8.7-11.3)         | 10.0(8.4-11.7)     | 0.49    |
| Creatinine(mg/dL)         | 1.0(0.6-1.7)          | 1.1(0.6-1.9)       | 0.61    | 1.0(0.6-2.0)          | 1.0(0.6-2.0)       | 0.73    |
| Glucose (mmol/L)          | 115(95-147)           | 113(91-145)        | >0.90   | 115(92.6-142.8)       | 108(90.8-137.5)    | 0.60    |
| Lactate                   | 1.7(1.1-2.9)          | 1.6(1.1-2.6)       | 0.56    | 1.6(1.0-3.0)          | 1.6(1.2-2.8)       | >0.90   |
| Potassium                 | 4.0(3.6-4.4)          | 4.0(3.7-4.3)       | 0.54    | 4.10(3.7-4.4)         | 4.0(3.8-4.3)       | 0.34    |
| Chloride                  | 103(99-108.0)         | 103.0(98-107)      | 0.33    | 101(98-105)           | 103(98-107)        | 0.53    |
| Clinical measures         |                       |                    |         |                       |                    |         |
| Vasopressin (n (%))       | 243(23.3)             | 21(27.6)           | 0.22    | 16(22.9)              | 19(27.1)           | 0.35    |
| Antibiotic (n (%))        | 1020(97.9)            | 71(93.4)           | 0.03    | 66(94.3)              | 65(92.9)           | 0.50    |
| MV (n (%))                | 846(81.2)             | 55(72.4)           | 0.046   | 55(78.6)              | 52(74.3)           | 0.35    |

PSM, propensity score matching; RR, respiratory rate; SBP, systolic blood pressure; DBP, diastolic blood pressure; MI, myocardial infarction; AF, atrial fibrillation; CHF, chronic heart failure; CKD, chronic kidney disease; AKI, acute kidney injury; RBC, red blood cell; WBC, white blood cell; MV, mechanical ventilation.

**Table S4** The baseline characteristics of septic patients without septic shock

|                           | Before PSM                                   |                                             |                 | After PSM                                      |                                             |                     |
|---------------------------|----------------------------------------------|---------------------------------------------|-----------------|------------------------------------------------|---------------------------------------------|---------------------|
|                           | Non-VD supplementation<br>group<br>(n= 3224) | VD-<br>supplementation<br>group<br>(n= 315) | <i>p</i> -value | Non-VD<br>supplementation<br>group<br>(n= 138) | VD-<br>supplementation<br>group<br>(n= 138) | <i>p</i> -<br>value |
| <b>Demographic data</b>   |                                              |                                             |                 |                                                |                                             |                     |
| Age (years )              | 67(55-80)                                    | 74(62-85)                                   | 0.03            | 71(60-84)                                      | 73(62-86)                                   | 0.52                |
| Male (n (%))              | 582(43.1)                                    | 76(52.4)                                    | 0.02            | 69(50.0)                                       | 70(50.7)                                    | 0.50                |
| Weight (Kg)               | 78(65-93)                                    | 72(62-87)                                   | 0.02            | 76(63-92)                                      | 72(62-71)                                   | 0.36                |
| <b>Vital signs</b>        |                                              |                                             |                 |                                                |                                             |                     |
| RR (/min)                 | 21(18-24)                                    | 21(18-24)                                   | 0.46            | 20(18-23)                                      | 21(18-24)                                   | 0.46                |
| SBP (mmHg)                | 116(101-134)                                 | 115(100-136)                                | 0.49            | 115(101-134)                                   | 116(100-137)                                | 0.90                |
| DBP (mmHg)                | 59(50-69)                                    | 59(49-70)                                   | 0.83            | 58(49-65)                                      | 60(49-71)                                   | 0.16                |
| Temperature (°C)          | 36.9(36.6-37.4)                              | 36.9(36.6-37.2)                             | 0.15            | 36.9(36.5-37.3)                                | 36.9(36.6-37.2)                             | >0.90               |
| <b>Comorbidities</b>      |                                              |                                             |                 |                                                |                                             |                     |
| MI (n (%))                | 116(8.6)                                     | 12(8.3)                                     | 0.53            | 11(8.0)                                        | 12(8.7)                                     | 0.50                |
| AF (n (%))                | 58(4.3)                                      | 9(6.2)                                      | 0.19            | 11(8.0)                                        | 9(6.5)                                      | 0.41                |
| CHF (n (%))               | 250(18.5)                                    | 36(24.8)                                    | 0.045           | 41(29.7)                                       | 36(29.1)                                    | 0.30                |
| CKD (n (%))               | 293(21.7)                                    | 37(25.5)                                    | 0.17            | 39(28.3)                                       | 36(26.1)                                    | 0.39                |
| AKI (n (%))               | 759(56.2)                                    | 79(54.5)                                    | 0.38            | 78(56.5)                                       | 77(55.58)                                   | 0.50                |
| Diabetes (n (%))          | 436(32.3)                                    | 48(33.1)                                    | 0.45            | 51(37.0)                                       | 47(34.1)                                    | 0.35                |
| Osteoporosis (n (%))      | 61(4.5)                                      | 23(15.9)                                    | <0.001          | 20(14.5)                                       | 21(15.2)                                    | 0.50                |
| Cerebral diseases (n (%)) | 145(10.7)                                    | 18(12.4)                                    | 0.31            | 19(13.8)                                       | 18(13.0)                                    | 0.50                |
| <b>Cinical indices</b>    |                                              |                                             |                 |                                                |                                             |                     |
| RBC (m/uL)                | 3.4(2.9-3.8)                                 | 3.3(2.9-3.7)                                | 0.72            | 3.4(2.9-3.9)                                   | 3.3(2.9-3.7)                                | 0.68                |
| WBC (K/uL)                | 9.7(6.6-14.3)                                | 10.2(7.1-14.6)                              | 0.77            | 10.7(7.0-14.2)                                 | 10.2(7.0-14.5)                              | >0.90               |
| Platelet (K/uL)           | 195(125-288)                                 | 204(138-259)                                | 0.37            | 198(142-289)                                   | 205(142-289)                                | 0.87                |
| Hemoglobin                | 10.1(8.8-11.4)                               | 9.9(8.7-11.5)                               | 0.46            | 10.2(8.8-11.5)                                 | 10.0(8.7-11.5)                              | 0.70                |
| Creatinine(mg/dL)         | 1.0(0.7-1.7)                                 | 1.0(0.7-1.7)                                | >0.90           | 1.1(0.7-1.7)                                   | 1.0(0.7-1.6)                                | 0.77                |
| Glucose (mmol/L)          | 118(97-151)                                  | 108(88-144)                                 | 0.09            | 107(92-134)                                    | 109(88-144)                                 | 0.31                |
| Lactate                   | 1.6(1.1-2.5)                                 | 1.7(1.2-2.5)                                | 0.65            | 1.7(1.2-2.6)                                   | 1.8(1.2-2.6)                                | 0.69                |
| Potassium                 | 4.0(3.7-4.4)                                 | 4.1(3.8-4.5)                                | 0.33            | 4.0(3.7-4.4)                                   | 4.1(3.8-4.5)                                | 0.13                |
| Chloride                  | 104(100-108)                                 | 103(99-108)                                 | 0.17            | 103(99-107)                                    | 103(100-108)                                | 0.52                |
| <b>Clinical measures</b>  |                                              |                                             |                 |                                                |                                             |                     |
| Vasopressin (n (%))       | 307(22.7)                                    | 29(20.0)                                    | 0.23            | 24(17.4)                                       | 29(21.0)                                    | 0.27                |
| Antibiotic                | 1324(98.0)                                   | 140(96.6)                                   | 0.19            | 134(97.1)                                      | 134(97.1)                                   | 0.64                |
| MV                        | 1105(81.8)                                   | 119(82.1)                                   | 0.52            | 122(88.4)                                      | 113(81.9)                                   | 0.09                |

PSM, propensity score matching; RR, respiratory rate; SBP, systolic blood pressure; DBP, diastolic blood pressure; MI, myocardial infarction; AF, atrial fibrillation; CHF, chronic heart failure; CKD, chronic kidney disease; AKI, acute kidney injury; RBC, red blood cell; WBC, white blood cell; MV, mechanical ventilation.

**Table S5** Clinical outcomes of young patients with sepsis (age < 60 years) after PSM

| <b>Clinical outcomes</b>         | All septic patients<br>(n=140) | Non-VD<br>Supplementation<br>group (n=70) | VD<br>Supplementation<br>group (n=70) | P-value |
|----------------------------------|--------------------------------|-------------------------------------------|---------------------------------------|---------|
| <b>Primary outcomes</b>          |                                |                                           |                                       |         |
| In-hospital mortality<br>(n (%)) | 33(23.6)                       | 16(22.9)                                  | 17(24.3)                              | 0.50    |
| 28-mortality (n (%))             | 24(17.1)                       | 11(15.7)                                  | 13(18.6)                              | 0.41    |
| 90-mortality (n (%))             | 32(22.9)                       | 15(21.4)                                  | 17(24.3)                              | 0.42    |
| <b>Secondary outcomes</b>        |                                |                                           |                                       |         |
| Mean SAPS II                     | 34(27-45)                      | 34(26-44)                                 | 33(27-46)                             | 0.17    |
| Mean APS III                     | 58(45-75)                      | 58(46-82)                                 | 58.3(44-73)                           | 0.19    |
| Mean SOFA                        | 7(4-9)                         | 7(4-9)                                    | 6(4-8)                                | 0.07    |
| ICU LOS (days)                   | 3.6(1.8-8.3)                   | 3.5(1.4-9.3)                              | 3.6(1.8-7.6)                          | 0.77    |
| Hospital LOS (days)              | 10.8(5.5-24.2)                 | 10.8(5.0-24.6)                            | 10.4(5.6-22.2)                        | 0.76    |

PSM, propensity score matching; SAPS II, Simplified Acute Physiology Score-II; APS III, Acute Physiology Score III; SOFA, Sequential Organ Failure Assessment; LOS, lengths of stay.

**Table S6** Clinical outcomes of septic patients without septic shock after PSM

| <b>Clinical outcomes</b>         | All septic patients<br>(n=276) | Non-VD<br>Supplementation<br>group (n=138) | VD<br>Supplementation<br>group (n=138) | P-value      |
|----------------------------------|--------------------------------|--------------------------------------------|----------------------------------------|--------------|
| <b>Primary outcomes</b>          |                                |                                            |                                        |              |
| In-hospital mortality<br>(n (%)) | 59(21.4)                       | 33(23.9)                                   | 26(18.8)                               | 0.19         |
| 28-mortality (n (%))             | 55(19.9)                       | 32(23.2)                                   | 23(16.7)                               | 0.11         |
| 90-mortality (n (%))             | 65(23.6)                       | 34(24.6)                                   | 31(22.5)                               | 0.39         |
| <b>Secondary outcomes</b>        |                                |                                            |                                        |              |
| Mean SAPS II                     | 41(33-49)                      | 41(33-51)                                  | 41(34-47)                              | 0.85         |
| Mean APS III                     | 52(42-73)                      | 53(43-74)                                  | 51(41-71)                              | 0.56         |
| Mean SOFA                        | 5(3-8)                         | 6(3-8)                                     | 5(3-8)                                 | <b>0.048</b> |
| ICU LOS (days)                   | 2.3(1.4-4.9)                   | 2.7(1.6-6.1)                               | 2.0(1.3-3.9)                           | 0.91         |
| Hospital LOS (days)              | 9.0(5.4-16.1)                  | 9.0(5.6-16.8)                              | 9.1(5.3-15.3)                          | 0.44         |

SAPS II, Simplified Acute Physiology Score-II; APS III, Acute Physiology Score III; SOFA, Sequential Organ Failure Assessment; LOS, lengths of stay.

**Table S7** Clinical outcomes in patients with serum 25(OH)D values before and after PSM

|                                 | <i>Before PSM</i>                                   |                                                      |                     | <i>After PSM</i>                                       |                                                     |                     |
|---------------------------------|-----------------------------------------------------|------------------------------------------------------|---------------------|--------------------------------------------------------|-----------------------------------------------------|---------------------|
|                                 | <i>Non-VD<br/>supplementation group<br/>(n= 21)</i> | <i>VD-<br/>supplementation<br/>group<br/>(n= 12)</i> | <i>p-<br/>value</i> | <i>Non-VD<br/>supplementation<br/>group<br/>(n= 7)</i> | <i>VD-<br/>supplementation<br/>group<br/>(n= 7)</i> | <i>p-<br/>value</i> |
| <i>serum<br/>25(OH)D(ng/ml)</i> | 22.50(13.00-34.50)                                  | 14.00(11.00-24.00)                                   | <<br>0.001          | 16(12-22)                                              | 15(11-24)                                           | 0.64                |
| <i>Clinical outcomes</i>        |                                                     |                                                      |                     |                                                        |                                                     |                     |
| <i>In-hospital mortality</i>    | 6(28.6)                                             | 3(25.0)                                              | 0.82                | 3(42.9)                                                | 1(14.3)                                             | 0.56                |
| <i>28-day mortality</i>         | 4(19.0)                                             | 2(16.7)                                              | 0.86                | 2(28.6)                                                | 0(0)                                                | 0.46                |
| <i>90-day mortality</i>         | 7(33.3)                                             | 4(33.3)                                              | >0.90               | 3(42.9)                                                | 2(28.6)                                             | 0.59                |

PSM, propensity score matching.

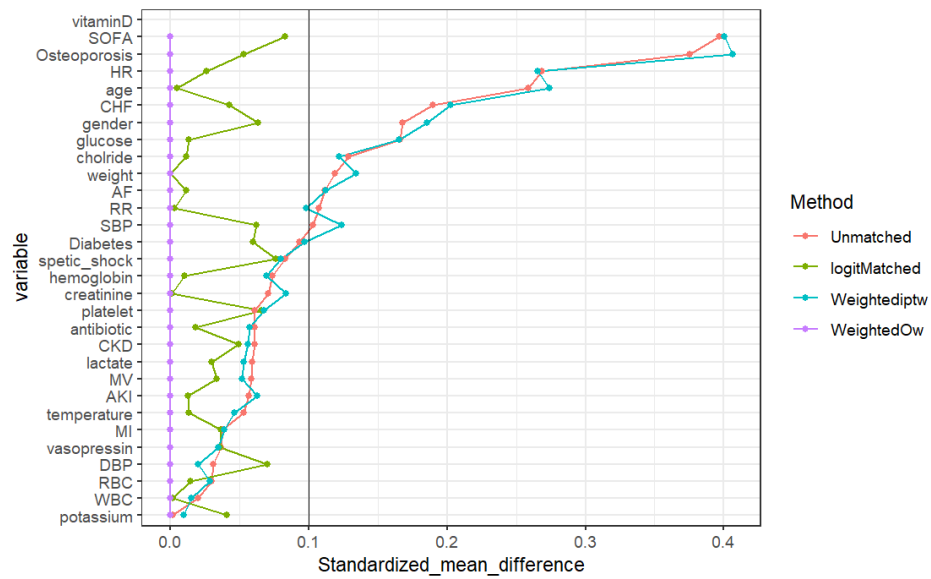

**Figure S1** Standardized mean differences of baseline characteristics in unmatched, 1:1 PSM, IPTW and OW-adjusted cohort. PSM, propensity score matching; IPTW, inverse probability of treatment weighting; OW, overlap weighting.



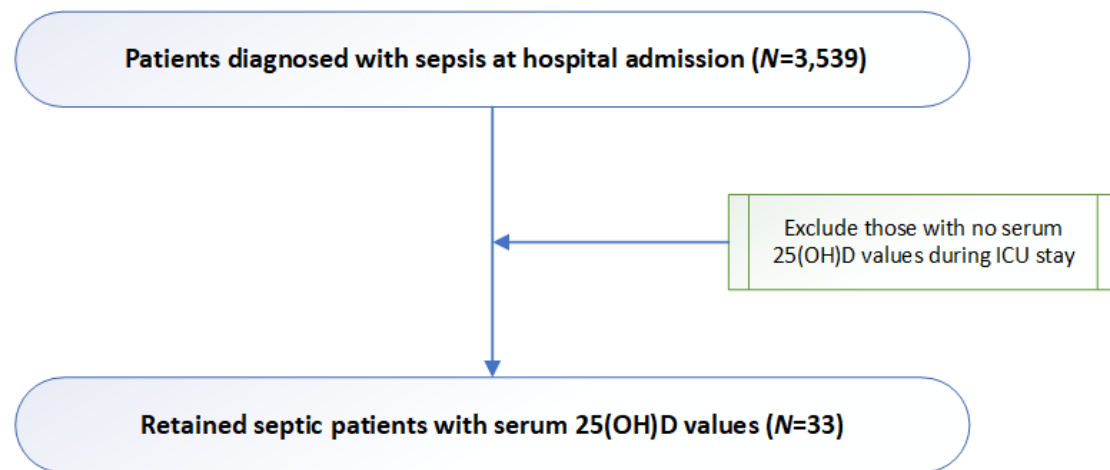

**Figure S2** Flow chart of identifying patients with serum 25(OH)D values.

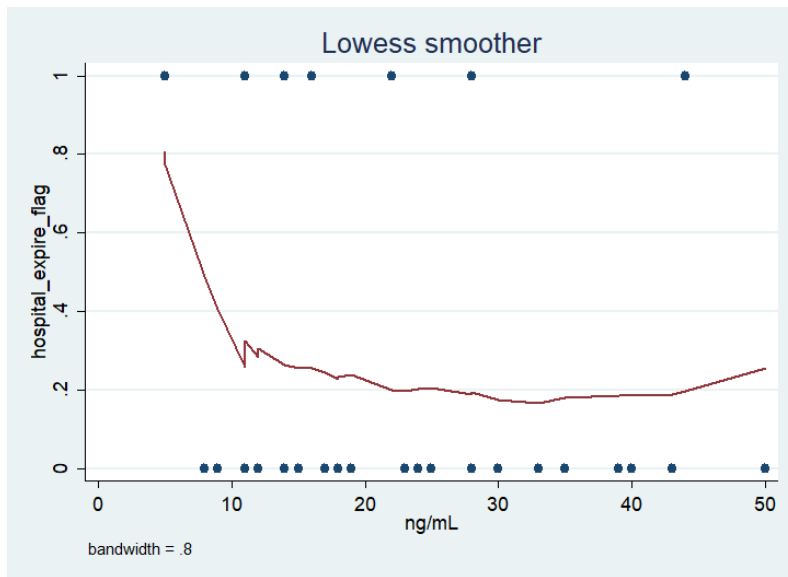

**Figure S3** Association between serum 25(OH)D and in-hospital mortality in patients with serum 25(OH)D values. The y axis represents the survival probabilities of patients.
